# Supplementary material
Source: PubMed Central journal article supplement (PMC7245349)

SUPPLEMENTARY DATA

**Supplementary Table 1. Means (SDs) of changes in BMI, physical activity, and AHEI-2010 score among each sleep trajectory compared to consistent 7h sleep duration**

|                                               | Persistent 5h<br>sleep duration | Persistent 6h<br>sleep duration | Persistent 7h<br>sleep duration | Persistent 8h<br>sleep duration | Increased<br>sleep duration | Decreased<br>sleep duration | P*    |
|-----------------------------------------------|---------------------------------|---------------------------------|---------------------------------|---------------------------------|-----------------------------|-----------------------------|-------|
| 2-years BMI change                            | -0.03 (2.51)                    | 0.04 (2.16)                     | 0.01 (1.86)                     | -0.04 (1.85)                    | -0.06 (2.09)                | 0.00 (1.98)                 | 0.008 |
| 4-years BMI change                            | -0.02 (2.86)                    | 0.12 (2.54)                     | 0.11 (2.22)                     | 0.04 (2.24)                     | 0.03 (2.58)                 | 0.13 (2.38)                 | 0.009 |
| 6-years BMI change                            | 0.02 (3.23)                     | 0.26 (2.80)                     | 0.25 (2.48)                     | 0.19 (2.49)                     | 0.14 (2.79)                 | 0.29 (2.65)                 | 0.001 |
| Physical activity change<br>(METs-hours/week) | 4.68 (32.79)                    | 3.88 (28.67)                    | 4.22 (27.53)                    | 3.74 (27.39)                    | 4.15 (28.56)                | 3.99 (26.74)                | 0.35  |
| AHEI-2010 change                              | 3.01 (9.34)                     | 3.22 (9.10)                     | 3.40 (9.20)                     | 3.31 (9.42)                     | 3.30 (9.38)                 | 3.22 (9.11)                 | 0.58  |

\* P value was calculated by ANOVA.

The 2-years BMI change was the change from baseline (2009) to 2011, the 4-years BMI change was from baseline to 2013, and the 6-years BMI change was from baseline to 2015. The physical activity change was 4-years change from baseline to 2013 and the AHEI-2010 change was 4-years change from 2007 to 2011, based on data availability.

SUPPLEMENTARY DATA

**Supplementary Table 2. 2-year lag analyses on hazard ratios (95% CI) of type 2 diabetes according to trajectories of sleeping time**

|                    | Consistent sleep duration of 5h | Consistent sleep duration of 6h | Consistent sleep duration of 7h | Consistent sleep duration of 8h | Increased sleep duration from 6 to 7.5h | Decreased sleep duration from 8 to 6h |
|--------------------|---------------------------------|---------------------------------|---------------------------------|---------------------------------|-----------------------------------------|---------------------------------------|
| Cases/person-years | 36/7,183                        | 273/60,496                      | 467/144,136                     | 216/71,052                      | 72/17,599                               | 82/18,135                             |
| Age-adjusted       | 1.52 (1.08, 2.14)               | 1.39 (1.19, 1.61)               | 1.00                            | 0.94 (0.80, 1.11)               | 1.32 (1.03, 1.70)                       | 1.43 (1.13, 1.81)                     |
| MV1                | 1.20 (0.85, 1.70)               | 1.23 (1.05, 1.43)               | 1.00                            | 0.95 (0.80, 1.11)               | 1.27 (0.99, 1.63)                       | 1.23 (0.97, 1.56)                     |
| MV2                | 1.15 (0.81, 1.62)               | 1.22 (1.05, 1.42)               | 1.00                            | 0.96 (0.82, 1.13)               | 1.19 (0.92, 1.53)                       | 1.21 (0.95, 1.53)                     |
| MV3                | 1.00 (0.71, 1.41)               | 1.15 (0.99, 1.34)               | 1.00                            | 1.02 (0.87, 1.20)               | 1.08 (0.84, 1.39)                       | 1.17 (0.92, 1.48)                     |

Hazard ratios were estimated from age stratified Cox proportional hazards model.

MV1 model was adjusted for race (non-white or white), family history of diabetes, menopausal status (pre or post-menopausal), postmenopausal hormone use (never, past, or current), smoking status (never, past, or current), alcohol intake (0, 0-<5, 5-<15, 15-<30, or ≥30 g/day), Alternate Healthy Eating Index dietary score (in quintiles), physical activity (<3, 3-<9, 9-<18, 18-<27, ≥27 MET-h/week), marital status (yes or no), parity (nulliparous, 1, 2, or ≥3), physical exam (yes or no), duration of rotating night shift work (year), and chronotype (morning type, evening type, neither type, or missing). All covariates, except race, family history, parity, and chronotype, were modeled as time-varying.

MV2 model was further adjusted for development of hypertension (yes or no), hypercholesterolemia (yes or no), depression (yes or no), and sleep apnea (yes or no).

MV3 model was further adjusted for updated body mass index (<20, 20-<25, 25-<30, 30-<35, 35-<40, ≥40).

SUPPLEMENTARY DATA

**Supplementary Table 3. Stratified analyses on hazard ratios (95% CI) of type 2 diabetes according to trajectories of sleeping time**

|                     | Consistent 5h     | Consistent 6h     | Consistent 7h | Consistent 8h     | Increased         | Decreased         | P for interaction |
|---------------------|-------------------|-------------------|---------------|-------------------|-------------------|-------------------|-------------------|
| <b>Age &lt; 60</b>  |                   |                   |               |                   |                   |                   |                   |
| Cases/person-years  | 40/6,534          | 254/55,342        | 441/130,903   | 213/64,582        | 85/16,955         | 98/17,182         |                   |
| MV                  | 1.36 (0.98, 1.89) | 1.18 (1.01, 1.38) | 1.00          | 0.97 (0.82, 1.14) | 1.44 (1.14, 1.82) | 1.44 (1.16, 1.80) | 0.59              |
| <b>Age ≥ 60</b>     |                   |                   |               |                   |                   |                   |                   |
| Cases/person-years  | 26/3,515          | 154/28,934        | 284/69,025    | 128/33,838        | 34/7,586          | 40/8,042          |                   |
| MV                  | 1.51 (1.00, 2.27) | 1.16 (0.95, 1.41) | 1.00          | 0.95 (0.77, 1.18) | 1.11 (0.77, 1.58) | 1.09 (0.78, 1.52) |                   |
| <b>BMI &lt; 30</b>  |                   |                   |               |                   |                   |                   |                   |
| Cases/person-years  | 12/6,493          | 111/59,410        | 237/152,097   | 98/76,250         | 37/17,112         | 41/17,808         |                   |
| MV                  | 0.92 (0.51, 1.66) | 1.03 (0.82, 1.29) | 1.00          | 0.84 (0.66, 1.06) | 1.46 (1.03, 2.08) | 1.20 (0.85, 1.68) | 0.18              |
| <b>BMI ≥ 30</b>     |                   |                   |               |                   |                   |                   |                   |
| Cases/person-years  | 54/3,556          | 297/24,866        | 488/47,831    | 243/22,169        | 82/7,429          | 97/7,416          |                   |
| MV                  | 1.34 (1.00, 1.79) | 1.13 (0.98, 1.31) | 1.00          | 1.08 (0.92, 1.26) | 1.08 (0.85, 1.37) | 1.23 (0.98, 1.53) |                   |
| <b>Morning type</b> |                   |                   |               |                   |                   |                   |                   |
| Cases/person-years  | 32/5,500          | 200/47,802        | 407/127,191   | 190/62,370        | 59/15,016         | 64/14,077         |                   |
| MV                  | 1.47 (1.01, 2.12) | 1.16 (0.98, 1.38) | 1.00          | 0.96 (0.81, 1.15) | 1.21 (0.92, 1.59) | 1.26 (0.96, 1.64) |                   |
| <b>Evening type</b> |                   |                   |               |                   |                   |                   |                   |
| Cases/person-years  | 31/3,817          | 180/31,253        | 285/62,637    | 134/30,723        | 54/8,307          | 66/9,764          | 0.93              |

SUPPLEMENTARY DATA

|                                           |                   |                   |             |                   |                   |                   |      |
|-------------------------------------------|-------------------|-------------------|-------------|-------------------|-------------------|-------------------|------|
| MV                                        | 1.39 (0.95, 2.04) | 1.12 (0.92, 1.36) | 1.00        | 0.95 (0.77, 1.17) | 1.41 (1.04, 1.89) | 1.34 (1.02, 1.76) |      |
| <b>Neither</b>                            |                   |                   |             |                   |                   |                   |      |
| Cases/person-years                        | 2/667             | 26/4,735          | 31/9,367    | 15/4,957          | 5/1,135           | 8/1,268           |      |
| MV                                        | 0.56 (0.10, 3.07) | 1.77 (0.97, 3.22) | 1.00        | 0.91 (0.45, 1.84) | 2.44 (0.82, 7.24) | 1.35 (0.53, 3.44) |      |
| <hr/>                                     |                   |                   |             |                   |                   |                   |      |
| <b>Never had night shift</b>              |                   |                   |             |                   |                   |                   |      |
| Cases/person-years                        | 11/1,693          | 76/19,642         | 190/60,469  | 100/34,442        | 18/5,168          | 48/7,617          |      |
| MV                                        | 1.63 (0.87, 3.03) | 1.09 (0.83, 1.44) | 1.00        | 0.94 (0.73, 1.20) | 1.19 (0.73, 1.95) | 1.80 (1.29, 2.49) | 0.26 |
| <b>Ever had night shift</b>               |                   |                   |             |                   |                   |                   |      |
| Cases/person-years                        | 55/8,356          | 332/64,633        | 535/139,460 | 241/63,978        | 101/19,373        | 90/17,607         |      |
| MV                                        | 1.44 (1.09, 1.91) | 1.20 (1.04, 1.38) | 1.00        | 0.99 (0.85, 1.15) | 1.38 (1.11, 1.71) | 1.15 (0.92, 1.44) |      |
| <hr/>                                     |                   |                   |             |                   |                   |                   |      |
| <b>Nulliparous</b>                        |                   |                   |             |                   |                   |                   |      |
| Cases/person-years                        | 21/2,133          | 68/14,390         | 133/32,523  | 94/20,542         | 21/4,617          | 36/5,073          |      |
| MV                                        | 1.73 (1.06, 2.82) | 0.96 (0.71, 1.30) | 1.00        | 1.14 (0.87, 1.50) | 1.08 (0.67, 1.75) | 1.52 (1.04, 2.24) | 0.11 |
| <b>Parous</b>                             |                   |                   |             |                   |                   |                   |      |
| Cases/person-years                        | 45/7,916          | 340/69,885        | 592/167,405 | 247/77,878        | 98/19,924         | 102/20,151        |      |
| MV                                        | 1.32 (0.97, 1.79) | 1.23 (1.07, 1.41) | 1.00        | 0.90 (0.78, 1.05) | 1.38 (1.11, 1.72) | 1.28 (1.03, 1.58) |      |
| <hr/>                                     |                   |                   |             |                   |                   |                   |      |
| <b>Without Family history of diabetes</b> |                   |                   |             |                   |                   |                   |      |
| Cases/person-years                        | 26/6,325          | 189/54,437        | 329/133,545 | 168/66,212        | 55/16,040         | 54/16,390         |      |
| MV                                        | 1.29 (0.86, 1.95) | 1.26 (1.05, 1.51) | 1.00        | 1.02 (0.84, 1.23) | 1.44 (1.08, 1.93) | 1.18 (0.88, 1.58) | 0.65 |
| <b>With Family history of diabetes</b>    |                   |                   |             |                   |                   |                   |      |

SUPPLEMENTARY DATA

|                                                             |                   |                   |             |                   |                   |                   |      |
|-------------------------------------------------------------|-------------------|-------------------|-------------|-------------------|-------------------|-------------------|------|
| Cases/person-years                                          | 40/3,724          | 219/29,839        | 396/66,384  | 173/32,208        | 64/8,501          | 84/8,833          |      |
| MV                                                          | 1.46 (1.05, 2.04) | 1.11 (0.94, 1.31) | 1.00        | 0.90 (0.75, 1.08) | 1.26 (0.96, 1.65) | 1.40 (1.10, 1.78) |      |
| <b>Physical activity &lt; median (16.9 METs-hours/week)</b> |                   |                   |             |                   |                   |                   |      |
| Cases/person-years                                          | 42/4,684          | 256/41,846        | 494/99,417  | 229/50,366        | 68/11,540         | 87/13,050         |      |
| MV                                                          | 1.41 (1.02, 1.95) | 1.12 (0.96, 1.30) | 1.00        | 0.93 (0.80, 1.09) | 1.15 (0.89, 1.49) | 1.21 (0.96, 1.52) | 0.37 |
| <b>Physical activity ≥ median (16.9 METs-hours/week)</b>    |                   |                   |             |                   |                   |                   |      |
| Cases/person-years                                          | 24/5,365          | 152/42,429        | 231/100,511 | 112/48,053        | 51/13,001         | 51/12,174         |      |
| MV                                                          | 1.35 (0.88, 2.07) | 1.28 (1.04, 1.58) | 1.00        | 0.99 (0.79, 1.25) | 1.56 (1.14, 2.12) | 1.58 (1.16, 2.16) |      |
| <b>AHEI-2010 &lt; median (53.0)</b>                         |                   |                   |             |                   |                   |                   |      |
| Cases/person-years                                          | 36/5,257          | 259/44,671        | 449/99,268  | 218/47,894        | 73/12,756         | 87/13,591         |      |
| MV                                                          | 1.23 (0.87, 1.73) | 1.18 (1.01, 1.38) | 1.00        | 1.01 (0.86, 1.19) | 1.31 (1.02, 1.68) | 1.26 (1.00, 1.59) | 0.55 |
| <b>AHEI-2010 ≥ median (53.0)</b>                            |                   |                   |             |                   |                   |                   |      |
| Cases/person-years                                          | 30/4,792          | 149/39,605        | 276/100,661 | 123/50,526        | 46/11,786         | 51/11,633         |      |
| MV                                                          | 1.72 (1.17, 2.54) | 1.20 (0.97, 1.47) | 1.00        | 0.89 (0.71, 1.10) | 1.43 (1.04, 1.96) | 1.40 (1.03, 1.89) |      |

Hazard ratios were estimated from age stratified Cox proportional hazards model.

MV model was adjusted for race (non-white or white), family history of diabetes, menopausal status (pre or post-menopausal), postmenopausal hormone use (current user or not), smoking status (never, past, or current), alcohol intake (0, 0-<5, 5-<15, or ≥15 g/day), Alternate Healthy Eating Index dietary score (in quintiles), physical activity (<3, 3-<9, 9-<18, 18-<27, ≥27 MET-h/week), marital status (yes or no), parity (nulliparous, 1, 2, or ≥3), and physical exam (yes or no), duration of rotating night shift work (year), and chronotype (morning type evening type, or neither), except the stratification factor.

The categorizations of postmenopausal hormone use and alcohol intake were changed due to the small numbers of cases.

For stratified analyses with chronotype, participants with missing chronotype data were excluded due to the small numbers of cases.

P for interactions were calculated by likelihood ratio tests comparing the models with and without interaction terms.

SUPPLEMENTARY DATA

**Supplementary Table 4. Hazard ratios (95% CI) of type 2 diabetes according to sleep duration in each age period**

|                    | ≤ 5h              | 6h                | 7h          | 8h                | ≤ 9h              |
|--------------------|-------------------|-------------------|-------------|-------------------|-------------------|
| <b>Age 20-25</b>   |                   |                   |             |                   |                   |
| Cases/person-years | 92/16,847         | 404/86,853        | 655/172,559 | 554/144,227       | 92/21,952         |
| MV1                | 1.24 (1.00, 1.55) | 1.16 (1.02, 1.31) | 1.00        | 1.03 (0.92, 1.15) | 1.01 (0.81, 1.26) |
| MV2                | 1.00 (0.80, 1.24) | 1.03 (0.91, 1.17) | 1.00        | 1.04 (0.93, 1.17) | 1.02 (0.82, 1.27) |
| <b>Age 26-35</b>   |                   |                   |             |                   |                   |
| Cases/person-years | 114/20,867        | 525/114,332       | 714/186,883 | 402/109,461       | 42/10,895         |
| MV1                | 1.24 (1.02, 1.52) | 1.14 (1.01, 1.27) | 1.00        | 0.95 (0.84, 1.08) | 0.94 (0.68, 1.28) |
| MV2                | 1.04 (0.85, 1.27) | 1.04 (0.93, 1.17) | 1.00        | 1.00 (0.88, 1.13) | 0.98 (0.71, 1.34) |
| <b>Age 36-45</b>   |                   |                   |             |                   |                   |
| Cases/person-years | 103/19,482        | 504/104,653       | 735/192,743 | 412/114,447       | 43/11,112         |
| MV1                | 1.14 (0.92, 1.41) | 1.15 (1.02, 1.29) | 1.00        | 0.97 (0.86, 1.09) | 0.96 (0.71, 1.31) |
| MV2                | 0.96 (0.78, 1.19) | 1.08 (0.96, 1.21) | 1.00        | 1.00 (0.89, 1.13) | 0.96 (0.71, 1.32) |
| <b>Age 46+</b>     |                   |                   |             |                   |                   |

SUPPLEMENTARY DATA

| Cases/person-years | 143/21,682        | 482/98,870        | 670/179,187 | 424/124,938       | 78/17,762         |
|--------------------|-------------------|-------------------|-------------|-------------------|-------------------|
| MV1                | 1.41 (1.17, 1.69) | 1.19 (1.05, 1.34) | 1.00        | 0.97 (0.86, 1.09) | 1.10 (0.87, 1.40) |
| MV2                | 1.24 (1.04, 1.50) | 1.12 (1.00, 1.27) | 1.00        | 0.98 (0.86, 1.11) | 1.00 (0.78, 1.27) |

Hazard ratios were estimated from age stratified Cox proportional hazards model.

MV1 model was adjusted for race (non-white or white), family history of diabetes, menopausal status (pre or post-menopausal), postmenopausal hormone use (never, past, or current), smoking status (never, past, or current), alcohol intake (0, 0-<5, 5-<15, 15-<30, or ≥30 g/day), Alternate Healthy Eating Index dietary score (in quintiles), physical activity (<3, 3-<9, 9-<18, 18-<27, ≥27 MET-h/week), marital status (yes or no), parity (nulliparous, 1, 2, or ≥3), physical exam (yes or no), duration of rotating night shift work (year), and chronotype (morning type, evening type, neither type, or missing). All covariates, except race, family history, parity, and chronotype, were modeled as time-varying.

MV2 model was further adjusted for development of hypertension (yes or no), hypercholesterolemia (yes or no), depression (yes or no), sleep apnea (yes or no), and updated body mass index (<20, 20-<25, 25-<30, 30-<35, 35-<40, ≥40).

SUPPLEMENTARY DATA

**Supplementary Figure 1. Sleeping duration trajectory group according to chronotype.** P values were calculated from chi-square tests to compare whether the distribution of sleep duration trajectories differed by chronotype.

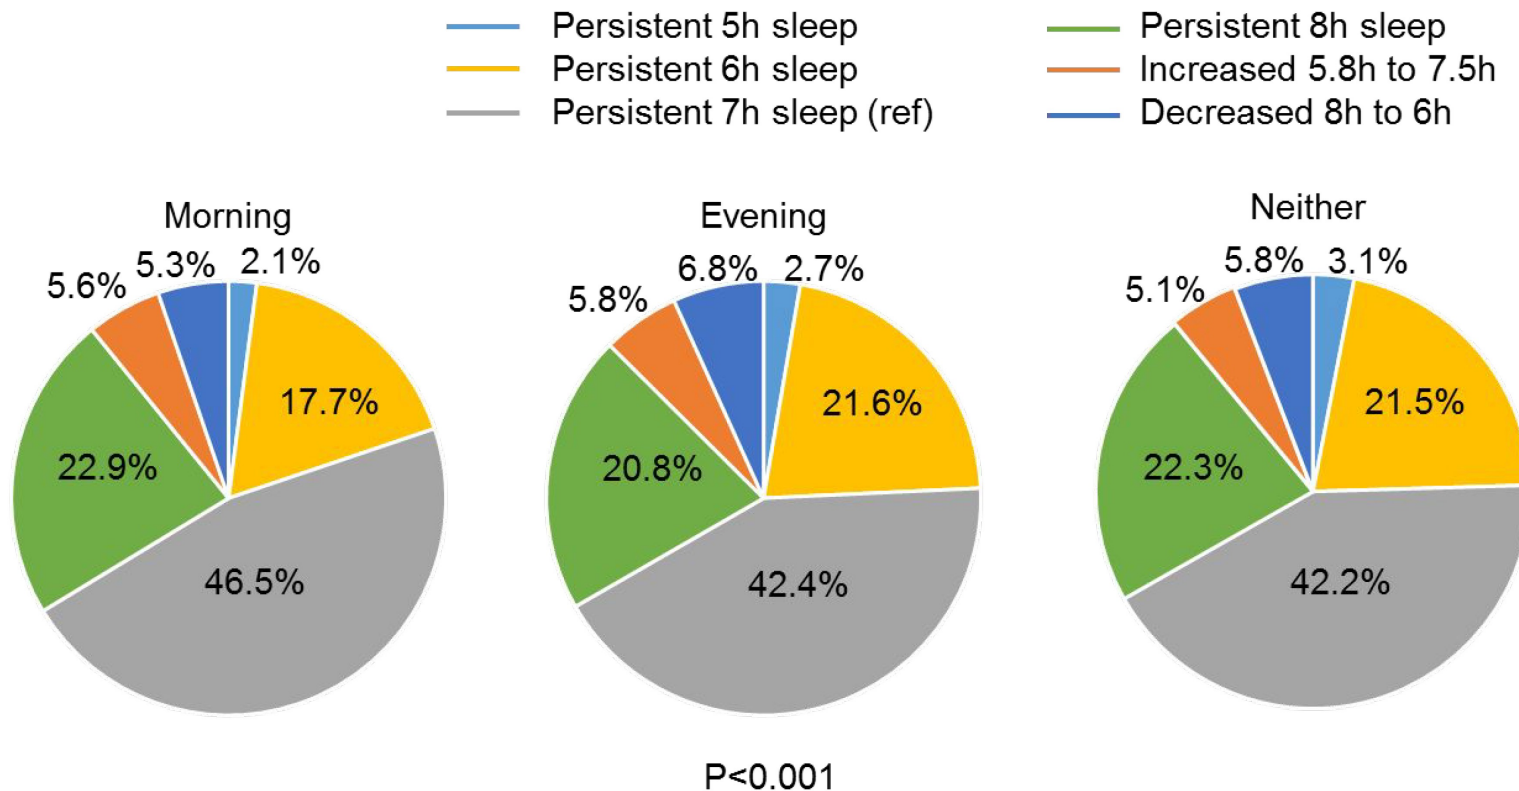

Supplement: DC192371SupplementaryData.pdf [file DC192371SupplementaryData.pdf]
